# Supplementary material for: Anatomy and activity patterns in a multifunctional motor neuron and its surrounding circuits
Source: eLife. 2021 Feb 15;10:e61881. doi: 10.7554/eLife.61881 (PMC7954528; doi:10.7554/eLife.61881)
Supplement: Figure 11—source data 1. — Included in the table are all parameter values that resulted in a significant link between anatomy and activity (p < 0.05). Parameter values are expressed in μm. Only the 10 most significant parameter value pairs are included for each trial. [file elife-61881-fig11-data1.csv]

Supplementary File 1. Results of the ANOVA analysis of synaptic clusters in all trials. Shown are all parameter values that resulted in a significant link between anatomy and activity (p < 0.05). Parameter values are expressed in μm. Only the 10 most significant parameter value pairs are shown for each trial.
Trial type	Trial number	dNN	dext	F-ratio	p-value
Swim	1	5	50	1.57	0.031
Swim	1	5	55	1.632	0.028
Swim	1	5	60	1.463	0.028
Swim	1	5	65	1.567	0.032
Swim	1	7.5	65	1.435	0.027
Swim	2	5	65	1.47	0.041
Crawl	1	10	15	1.672	0.038
Crawl	1	10	20	1.594	0.04
Crawl	1	7.5	15	1.958	0.038
Crawl	1	7.5	10	1.92	0.04
Crawl	1	7.5	20	1.831	0.038
Crawl	1	7.5	25	1.724	0.04
Crawl	1	10	15	1.673	0.028
Crawl	1	10	20	1.594	0.034
Crawl	1	12.5	15	1.533	0.028
Crawl	1	12.5	20	1.491	0.034
Crawl	2	7.5	25	1.786	0.028
Crawl	2	7.5	15	1.659	0.03
Crawl	2	7.5	10	1.64	0.029
Crawl	2	7.5	20	1.59	0.031
Crawl	2	10	25	1.479	0.038
Crawl	2	7.5	100	1.423	0.035
Crawl	2	12.5	30	1.415	0.037
Local bend	1	5	15	1.37	0.048
Local bend	2	5	15	1.726	0.036
Local bend	2	5	20	1.756	0.03
Local bend	2	5	25	1.751	0.03
Local bend	2	5	30	1.735	0.031
Local bend	2	5	35	1.735	0.021
Local bend	2	5	40	1.735	0.021
Local bend	2	7.5	25	1.8	0.042
Local bend	2	7.5	30	1.722	0.042
Local bend	2	7.5	35	1.714	0.042
Local bend	2	7.5	40	1.805	0.038
Local bend	3	5	80	1.52	0.039
Local bend	3	5	85	1.525	0.039
Local bend	3	5	90	1.525	0.037
Local bend	3	5	95	1.525	0.04
Local bend	3	5	100	1.526	0.037
Local bend	3	7.5	70	1.502	0.038
Local bend	3	7.5	75	1.591	0.034
Local bend	3	7.5	80	1.807	0.018
Local bend	3	7.5	85	1.768	0.022
Local bend	3	7.5	100	1.495	0.033
