# Supplementary figures and images for: Anatomy and activity patterns in a multifunctional motor neuron and its surrounding circuits
Source: eLife journal article supplement (doi:10.7554/elife.61881), 2021-02-15

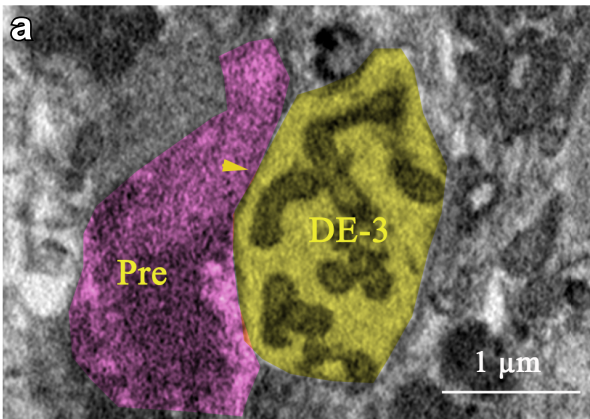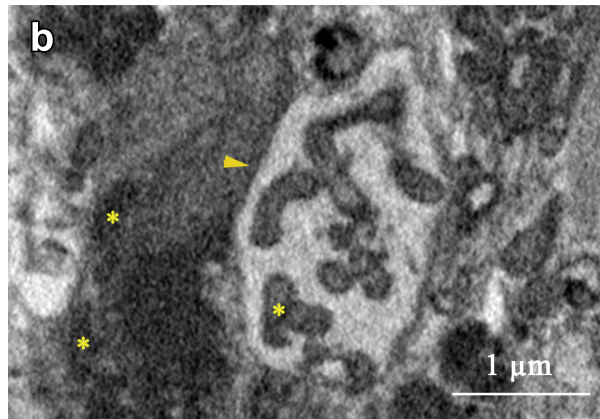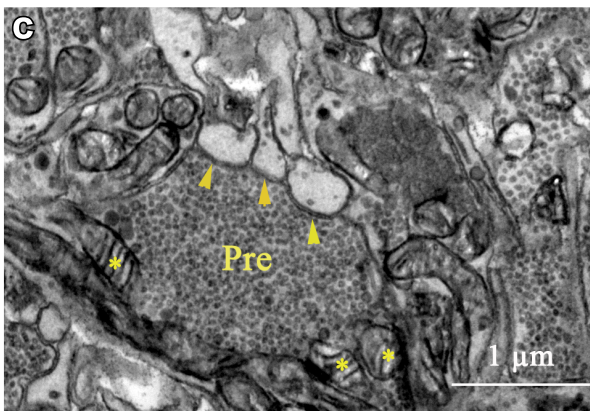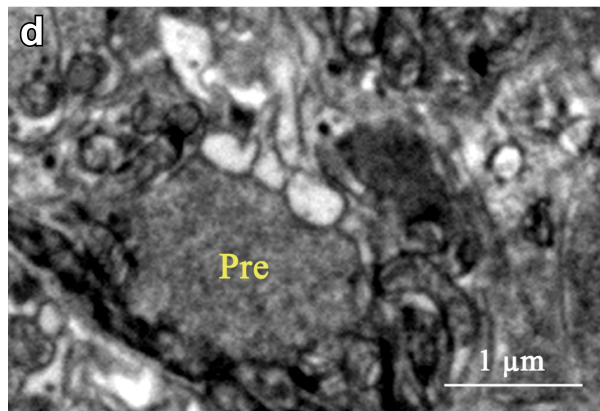

Supplement: supp [file elife-61881-supp-v1.zip]

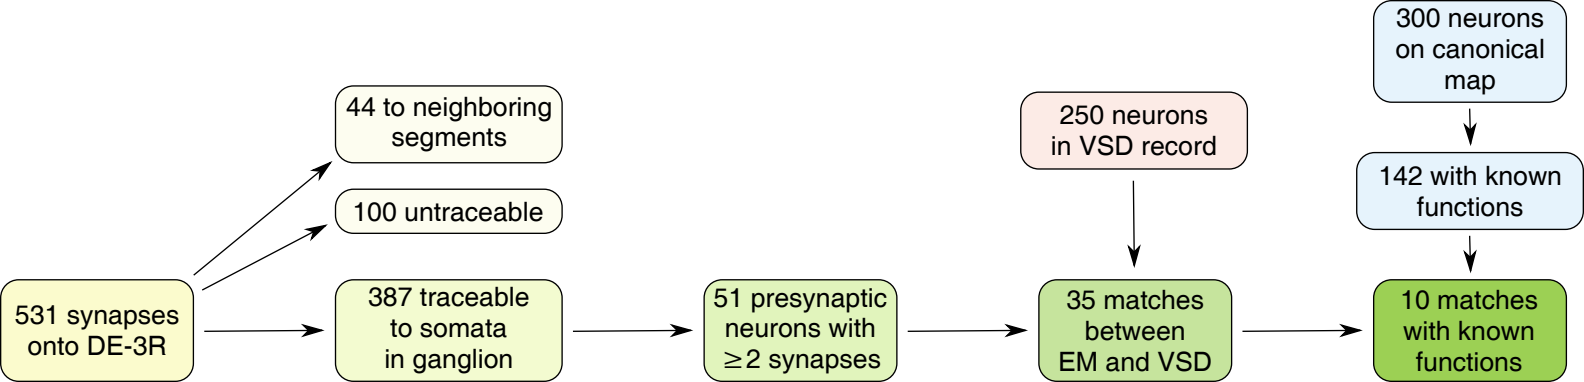

Supplement: supp [file elife-61881-supp-v1.zip]

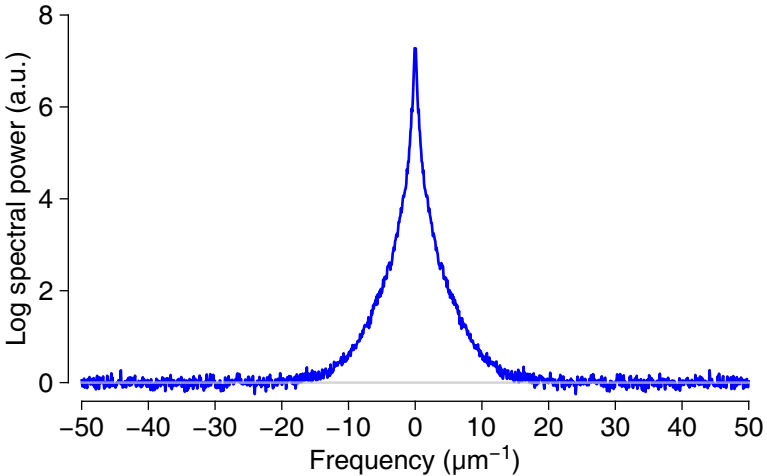

Supplement: supp [file elife-61881-supp-v1.zip]

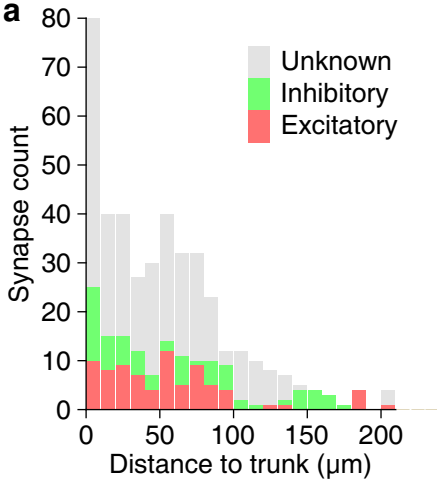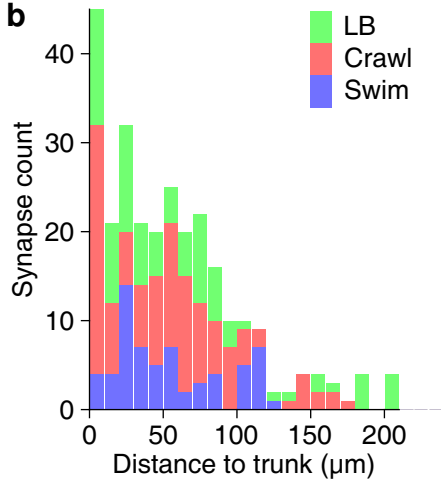

Supplement: supp [file elife-61881-supp-v1.zip]

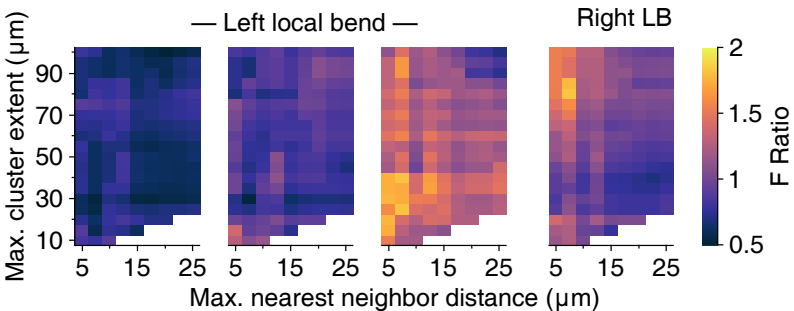

Supplement: supp [file elife-61881-supp-v1.zip]

**a**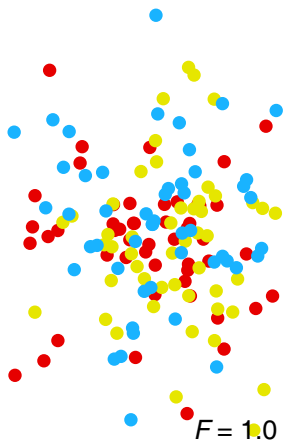**b**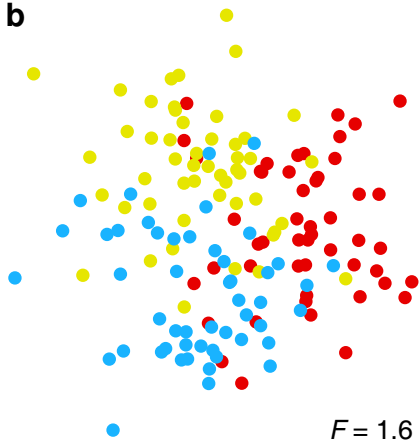

Supplement: supp [file elife-61881-supp-v1.zip]

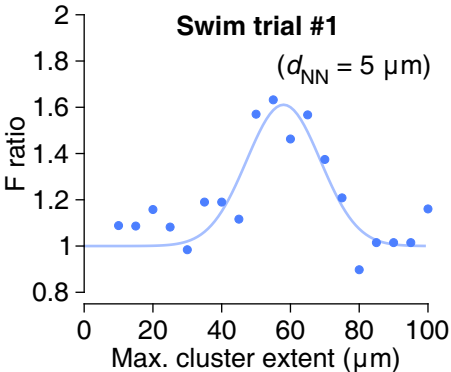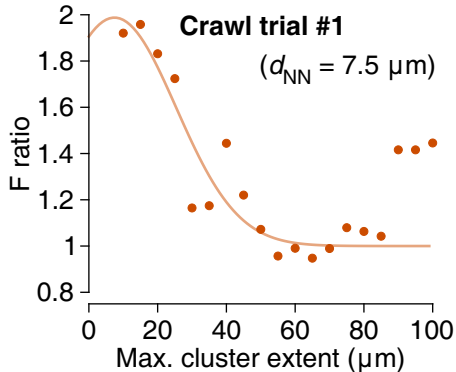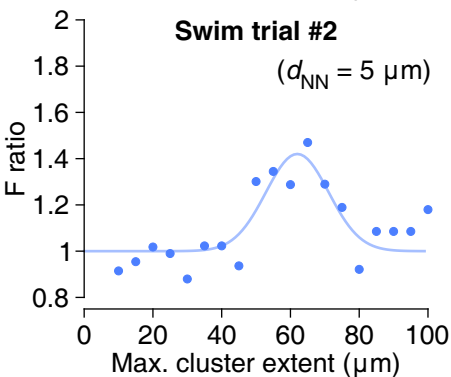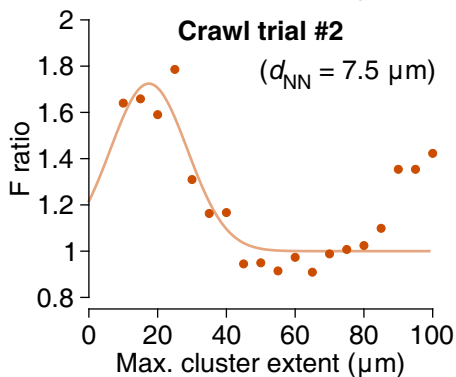

Supplement: supp [file elife-61881-supp-v1.zip]
